# Supplementary material for: Overexpression of Notch3 and pS6 Is Associated with Poor Prognosis in Human Ovarian Epithelial Cancer
Source: Hindawi journal article supplement (doi:10.1155/2016/5953498), 2016-01-01
Supplement: f1 [file 5953498.f1.pdf]

Table S1 Characteristics of the patients (n = 120).

| Clinicopathological features | Cases               |
|------------------------------|---------------------|
| Total No. of patients        | 120 <sup>#</sup>    |
| Histological type            |                     |
| Serous adenocarcinoma        | 77                  |
| Mucinous adenocarcinoma      | 43                  |
| Clinical stages              |                     |
| I-II                         | 41 <sup>##</sup>    |
| III-IV                       | 79 <sup>###</sup>   |
| Lymph node metastasis        |                     |
| Yes                          | 37                  |
| No                           | 83                  |
| Ascites                      |                     |
| Yes                          | 70                  |
| No                           | 50                  |
| Adjuvant chemotherapy        |                     |
| Yes                          | 108 <sup>####</sup> |
| No                           | 12                  |

Note: <sup>#</sup>, the median age is  $49 \pm 6$  years old (ranged from 36 to 68). <sup>##</sup>, received hysterectomy plus bilateral oophorectomy, omentum resection, appendectomy and pelvic lymph node dissection. <sup>###</sup>, cytoreductive surgery. <sup>####</sup>, 44 received Cisplatin + Adriamycin + Cyclophosphamide, and 64 received carboplatin +Taxol.

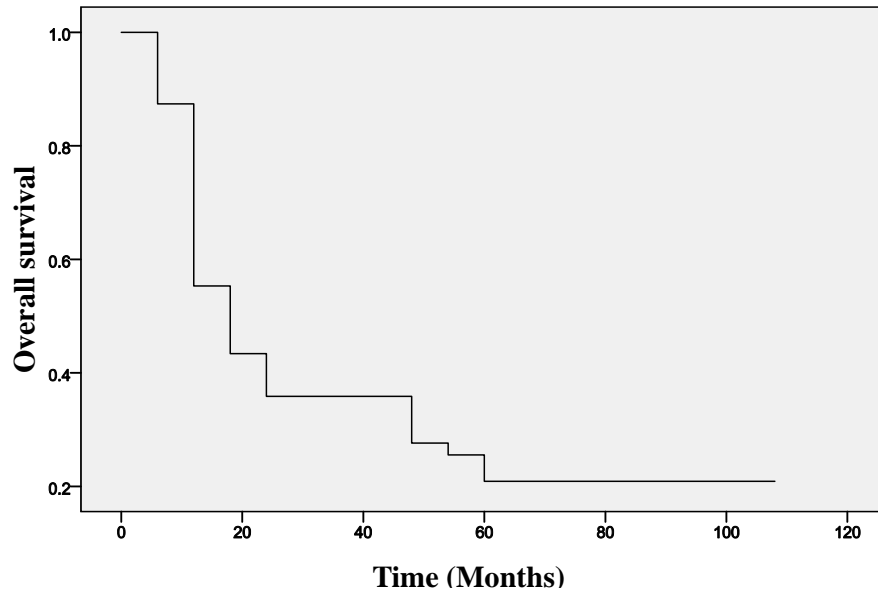

Fig. S1 The survival distribution function of 64 ovarian epithelial cancer patients on followed-up
